# Supplementary material for: Trigonal Cu2-II-Sn-VI4 (II = Ba, Sr and VI = S, Se) quaternary compounds for earth-abundant photovoltaics
Source: Royal Society of Chemistry journal article supplement (doi:10.1039/c5cp06977g), 2016-01-01
Supplement: c5cp06977g1.pdf [file c5cp06977g1.pdf]

## Trigonal $\text{Cu}_2\text{-II-Sn-VI}_4$ (II=Ba, Sr and VI=S, Se) Quaternary Compounds for Earth-Abundant Photovoltaics

Feng Hong,<sup>\*,†,‡</sup> Wenjun Lin,<sup>†</sup> Weiwei Meng,<sup>‡,§</sup> and Yanfa Yan<sup>\*,‡</sup>

<sup>†</sup>Department of Physics, Shanghai University, Shanghai 200444, China

<sup>‡</sup>Department of Physics and Astronomy, and Wright Center for Photovoltaic Innovation and Commercialization, The University of Toledo, Toledo, Ohio 43606, USA

<sup>§</sup>School of Physics and Technology, Wuhan University, Wuhan, 430072, China

### Supporting Information

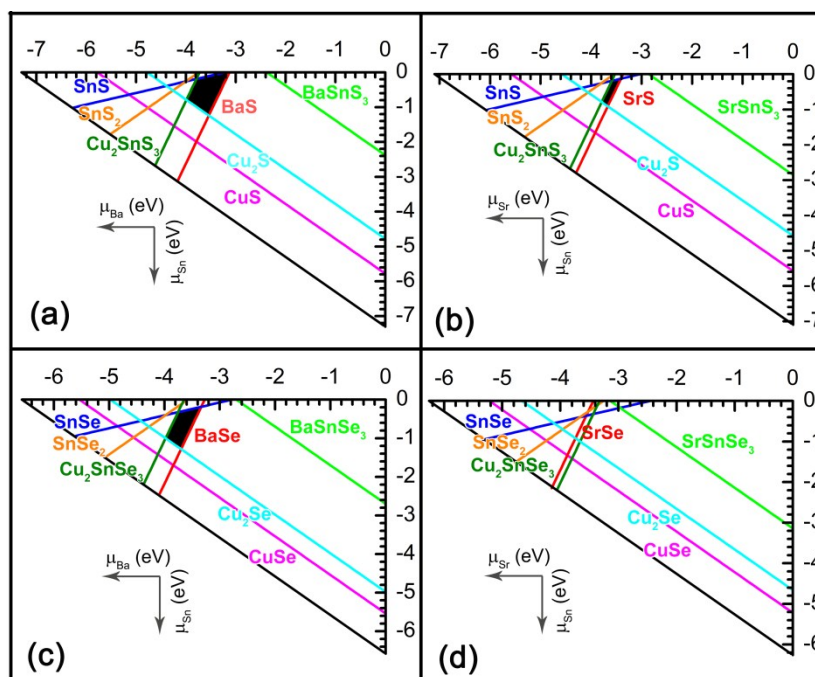

**Figure S1.** Thermodynamically stable range at  $\mu_{\text{Cu}} = -0.2$  eV plane for (a)  $\text{Cu}_2\text{BaSnS}_4$ , (b)  $\text{Cu}_2\text{SrSnS}_4$ , (c)  $\text{Cu}_2\text{BaSnSe}_4$  and (d)  $\text{Cu}_2\text{SrSnSe}_4$ , respectively.

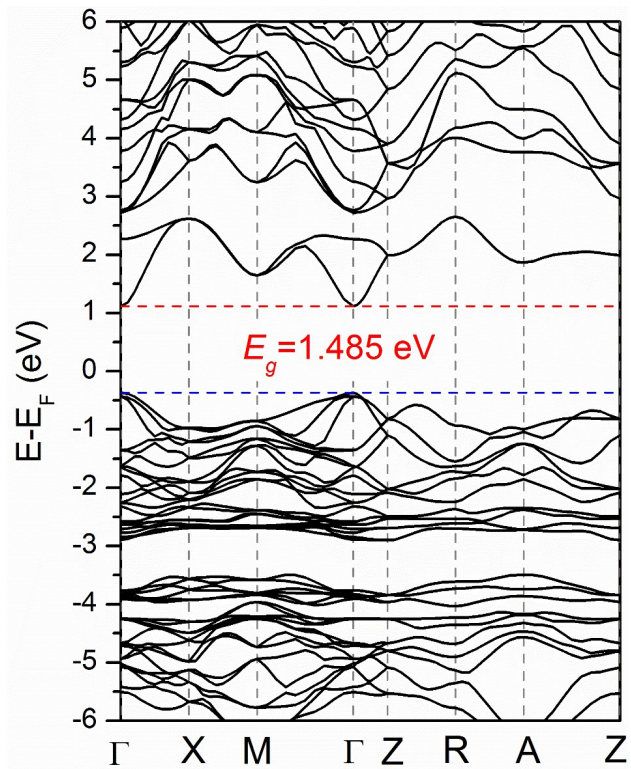

**Figure S2.** HSE calculated band structure of kesterite  $\text{Cu}_2\text{ZnSnS}_4$ .

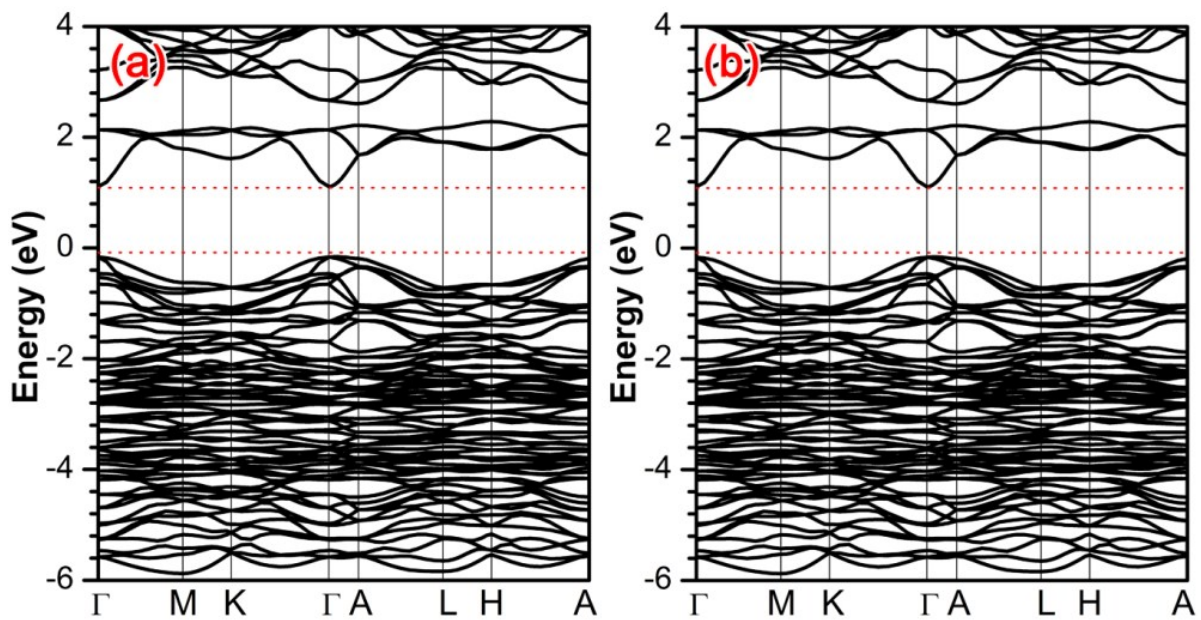

**Figure S3.** HSE calculated band structures for (a)  $\text{Cu}_2\text{BaSnSe}_4$  and (b)  $\text{Cu}_2\text{SrSnSe}_4$  with  $P3_1$  structures, respectively.

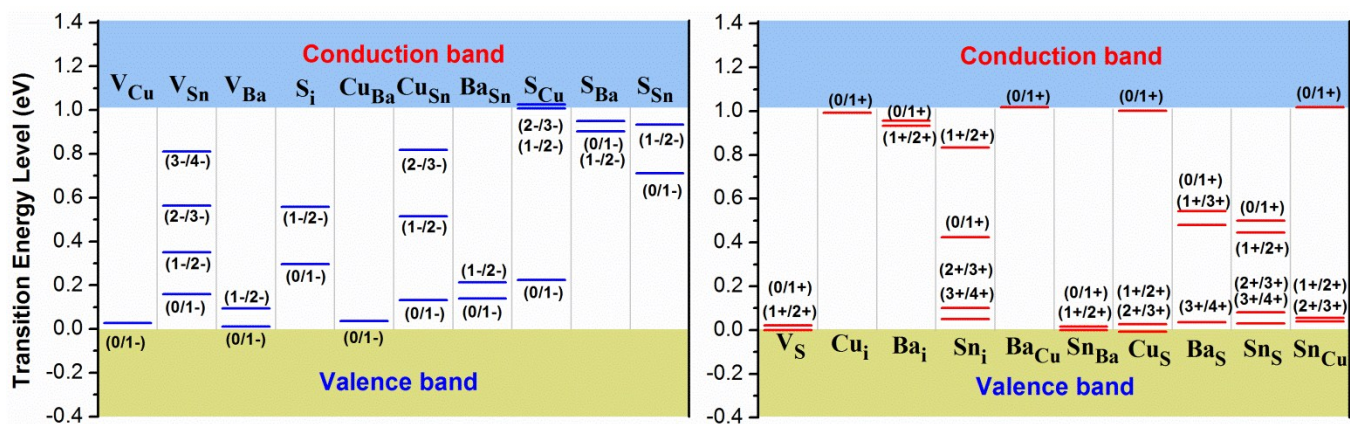

**Figure S4.** GGA+U calculated ( $U=6$  eV for Cu  $3d$  orbital) transition energy levels of (a) acceptor-like and (b) donor-like intrinsic defects in  $\text{Cu}_2\text{BaSnS}_4$ .
